# Supplementary material for: MafA-Controlled Nicotinic Receptor Expression Is Essential for Insulin Secretion and Is Impaired in Patients with Type 2 Diabetes
Source: PubMed Central journal article supplement — Cell Rep. Author manuscript; Available in PMC 2018 Apr 26. (PMC5918632; doi:10.1016/j.celrep.2016.02.002), 2016-02-18
Supplement: NIHMS872907-supplement-supplemental_files.pdf [file NIHMS872907-supplement-supplemental_files.pdf]

**Cell Reports, Volume 14**

**Supplemental Information**

**MafA-Controlled Nicotinic Receptor Expression Is  
Essential for Insulin Secretion and Is Impaired  
in Patients with Type 2 Diabetes**

**Elvira Ganic, Tania Singh, Cheng Luan, João Fadista, Jenny K. Johansson, Holly Ann Cyphert, Hedvig Bennet, Petter Storm, Gaëlle Prost, Henrik Ahlenius, Erik Renström, Roland Stein, Leif Groop, Malin Fex, and Isabella Artner**

Figure S1

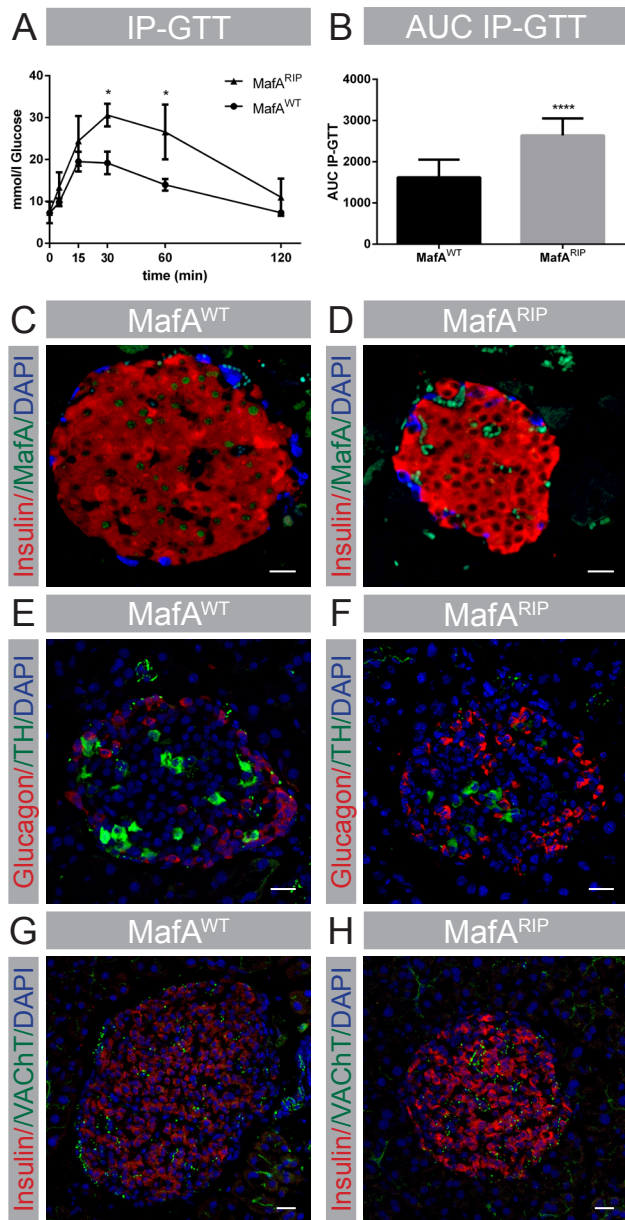

**Figure S1. Functional and morphological analysis of MafA<sup>RIP</sup> and MafA<sup>WT</sup> mice, related to Figure 1.**

**A and B:** Blood glucose levels after intraperitoneal glucose injection (intraperitoneal glucose tolerance test (IPGTT)) and area under curve (AUC) for the IPGTT in MafA<sup>RIP</sup> and MafA<sup>WT</sup> mice, n=8-11. **C and D:** MafA<sup>WT</sup> and MafA<sup>RIP</sup> islets are stained for  $\beta$  cells (insulin, red) and MAFA (green). **E and F:** Tyrosine hydroxylase (TH, green) showing the presence of sympathetic nerve fibers.  $\alpha$  cells are stained for glucagon in red. **G and H:** Immunostaining for the vesicular acetylcholine transporter (VACHT, green) visualizes parasympathetic nerve fibers in the MafA<sup>WT</sup> and MafA<sup>RIP</sup> pancreata. Scale bars = 20  $\mu$ m. Nuclei are stained with DAPI (blue).

Figure S2

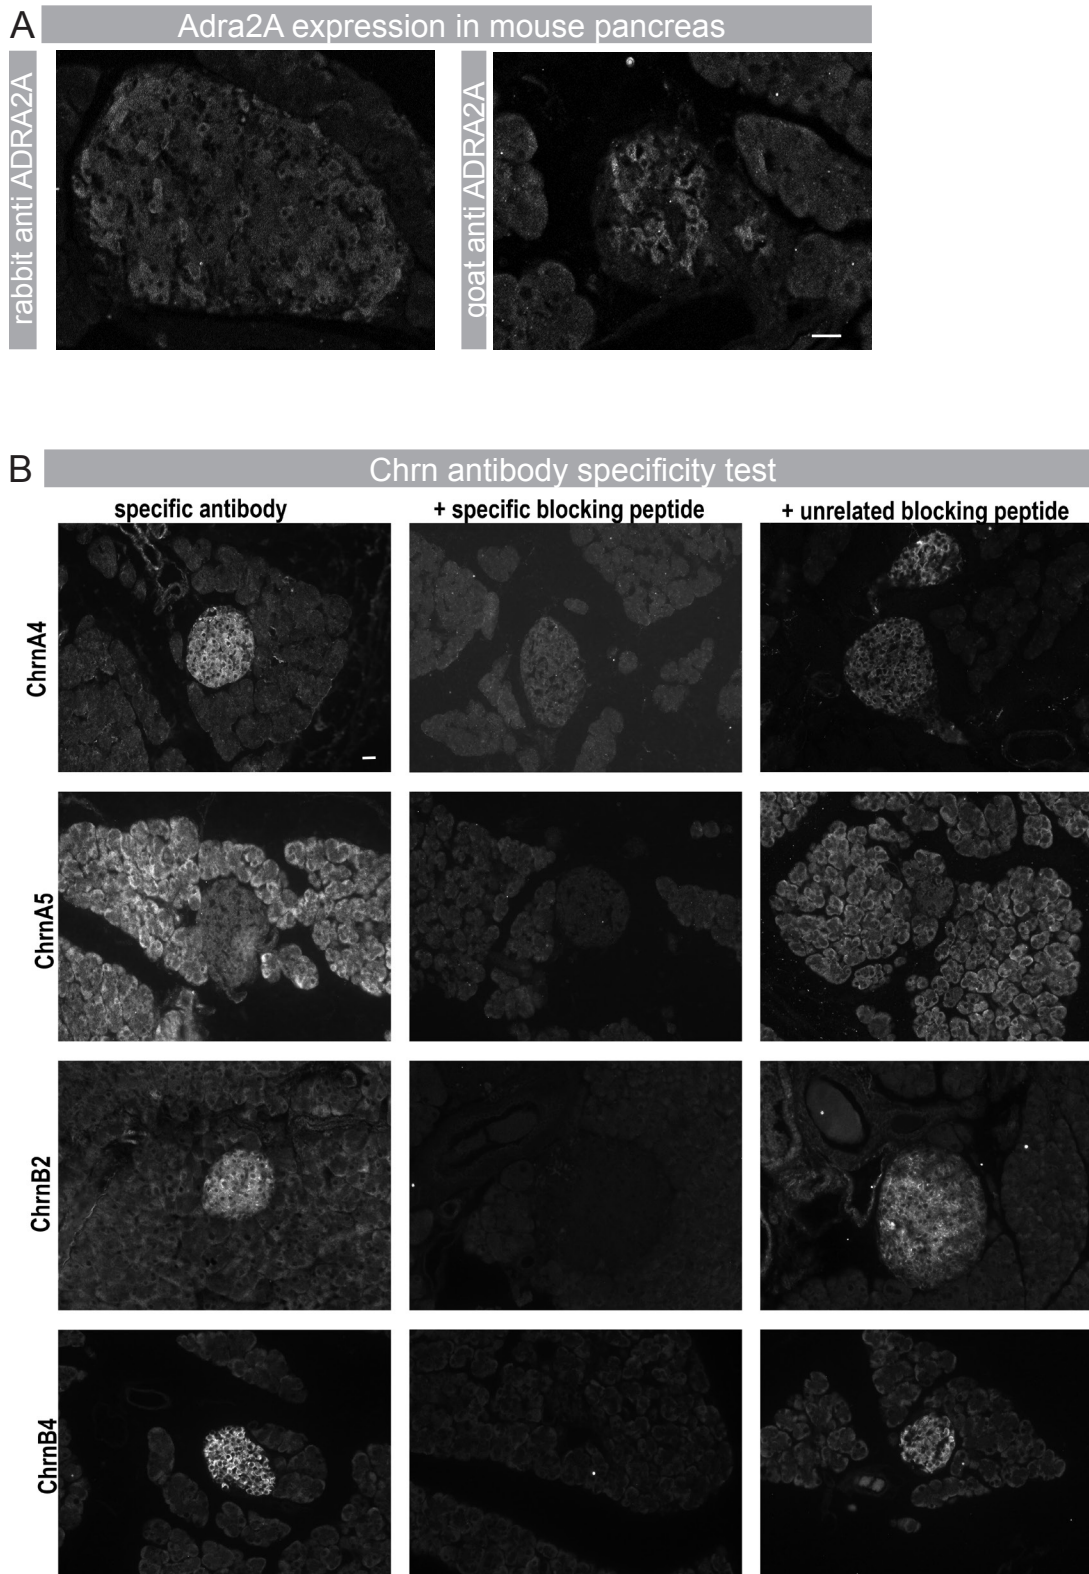

**Figure S2 Assessment of adrenergic and nicotinic receptor antibody specificity**, related to Figures 2 and 3.

**A:** MafA<sup>WT</sup> islets were stained for ADRA2A using antibodies raised in different species and against different ADRA2A peptides as indicated. **B:** MafA<sup>WT</sup> islets were stained for nicotinic receptor antibodies and antibodies preabsorbed with specific and unrelated peptides as indicated. Scale bars = 20  $\mu$ m

Figure S3

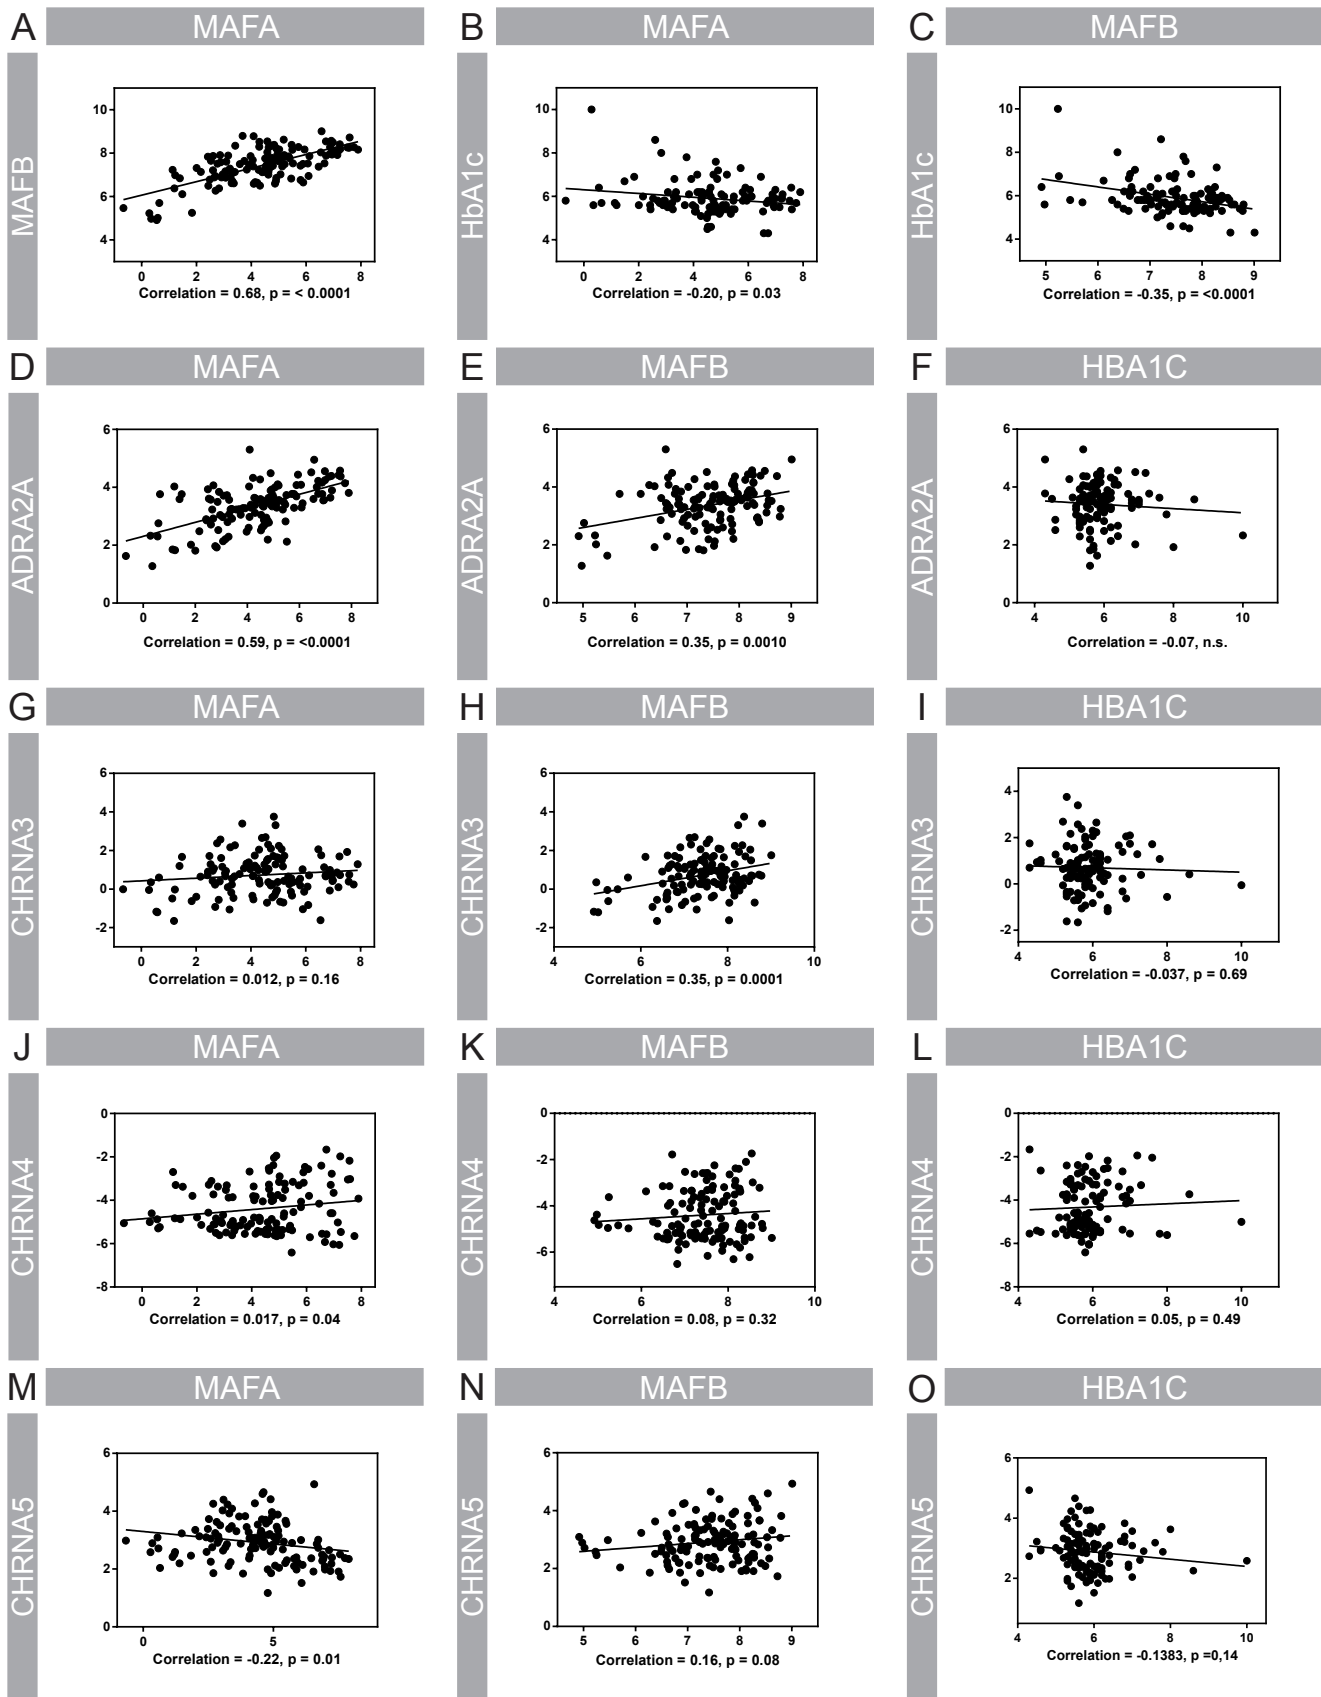

**Figure S3 Gene expression correlations of adrenergic and nicotinic receptors with MAF transcription factors and HbA1c, related to Figure 4.**

Correlation analysis of transcript levels of nicotinic (CHRN) and adrenergic (ADRA) genes with MAFA, MAFB or glycated hemoglobin (HbA1C) levels in islets from human donors (n=131). Linear regression and Pearson's correlation analyses were performed using GraphPad Prism. P values and correlation coefficients are indicated under each graph.

Figure S4

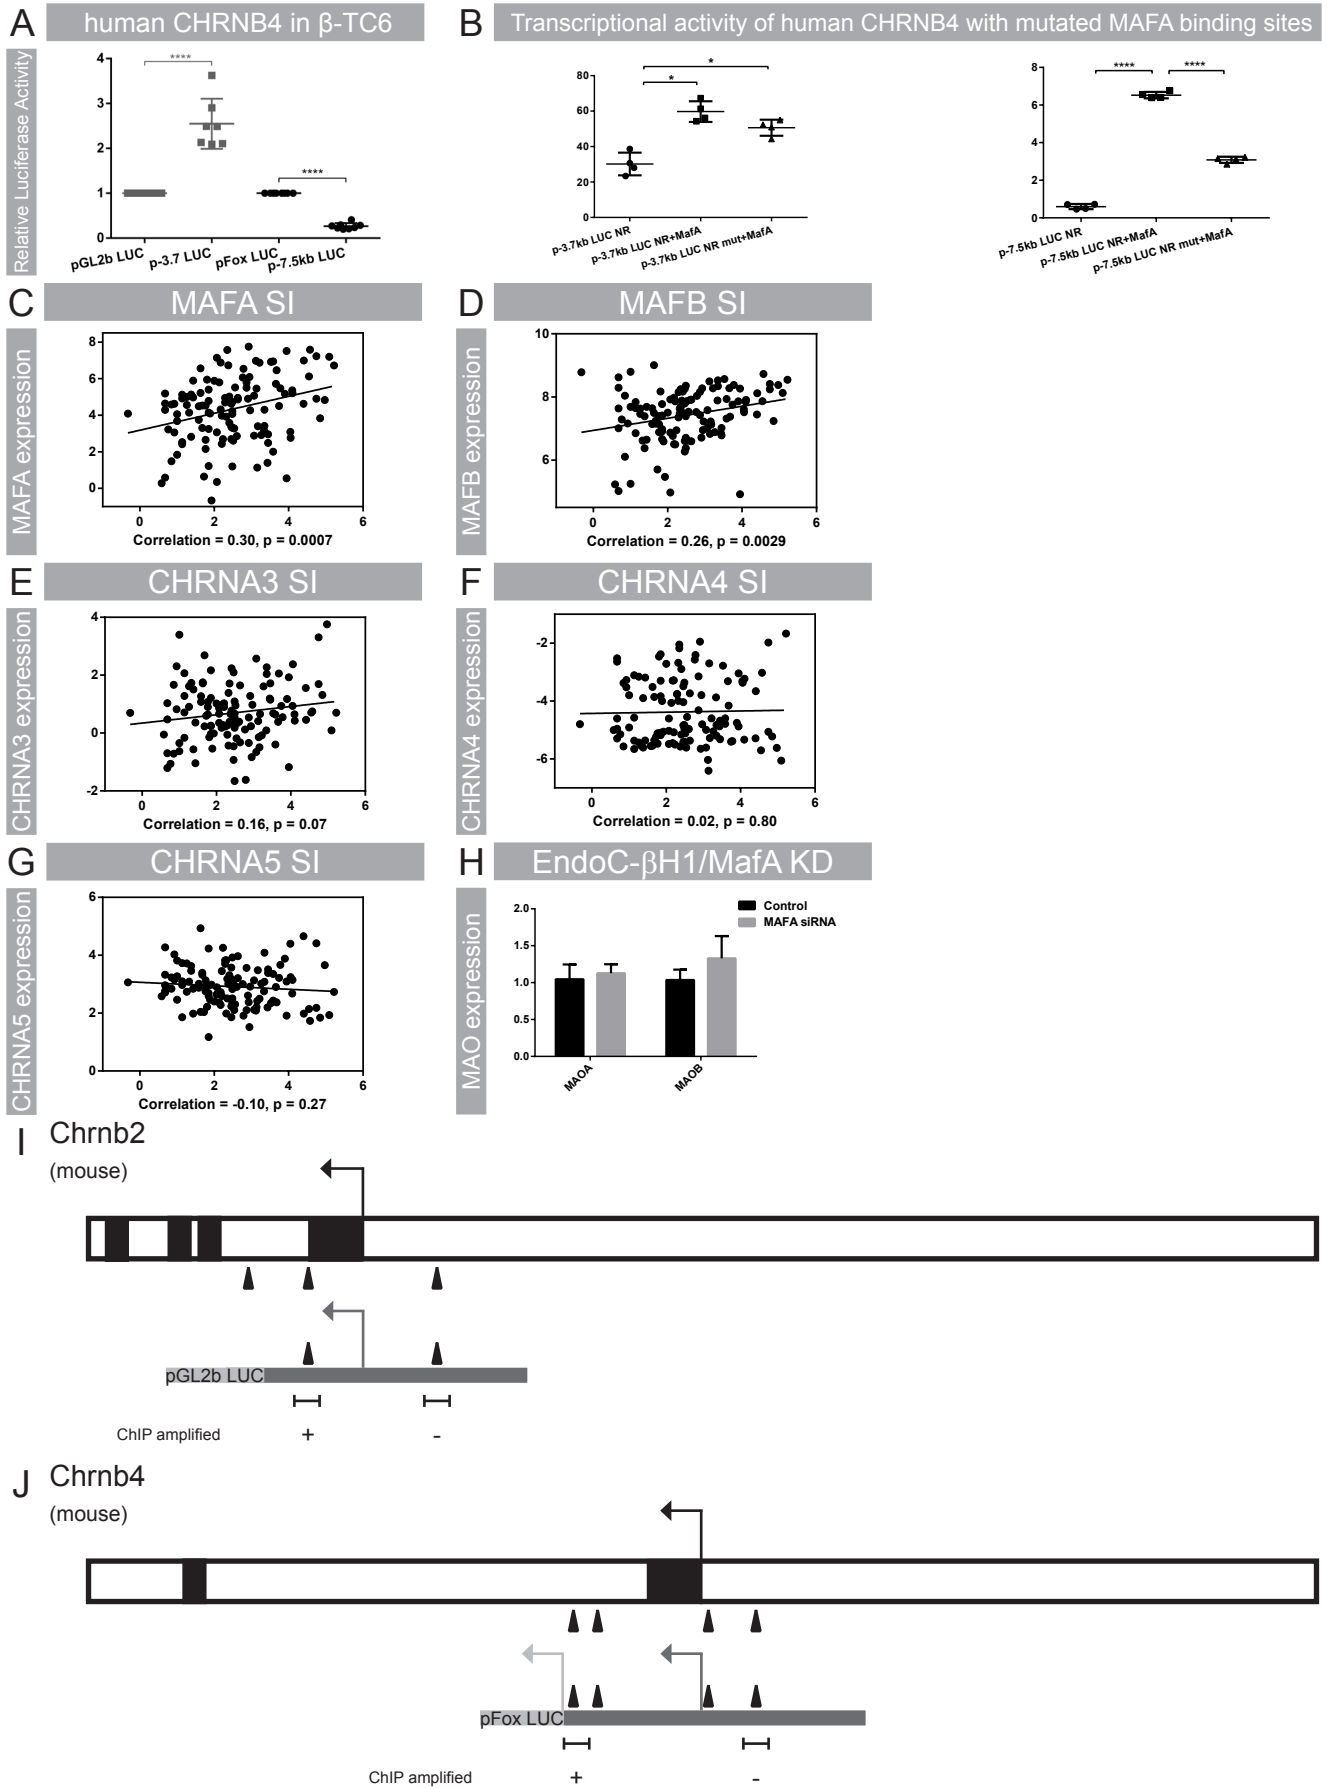

**Figure S4 MAFA controls nicotinic expression**, related to Figures 3 and 4.

**A:** Dual luciferase (LUC) reporter assay showing human pCHRNA4 luciferase reporter construct activity of p-3.7LUC and p-7.5kbLUC compared to empty vector control (pGL2bLUC, pFOXLUC) in  $\beta$ TC6 cells (n=7-8), \*\*\*\*p value <0.0001, analyzed by Student's t test. **B:** Dual luciferase reporter assay showing human pCHRNA4 NR luciferase construct activity upon mutation of predicted MAFA binding sites (mut) compared to control constructs. Constructs were co-transfected with pCMV-driven MafA as indicated. Experiments were performed in HEK293 cells n=4; \*p value<0.05, \*\*\*\*p value <0.0001, analyzed by Student's t test. **C to G:** Correlation analysis of *MAFA*, *MAFB*, *CHRNA3*, *CHRNA4*, *CHRNA5* mRNA expression with insulin stimulatory index (SI) in islets from 131 human donors. Correlation coefficients and p values are indicated under each graph. Linear regression and Pearson's correlation analyses were performed using GraphPad Prism. **H:** Effect of siRNA-mediated knockdown of *MAFA* in the human EndoC- $\beta$ H1 cell line on *MAOA* and *MAOB* mRNA levels, n=3-4. Data are mean  $\pm$  SEM, analyzed using Student's t-test. **I and J:** Schematic overview of *ChrnB2* and *ChrnB4* genomic regions in the mouse. Potential MafA binding sites are indicated as triangles, the location of specific luciferase reporter constructs and genomic sequences amplified by chromatin immunoprecipitation (ChIP) are indicated for each gene.

**Table S1.** mRNA expression of islet-specific genes in *MafA*<sup>WT</sup> and *MafA*<sup>RIP</sup> isolated islets.

|                           | <b>WT</b> | <b>MafA<sup>RIP</sup></b> | <b>p value</b> |
|---------------------------|-----------|---------------------------|----------------|
| <b><i>MafA</i></b>        | 0.134     | 0.0035                    | 0.0009 *       |
| <b><i>MafB</i></b>        | 0.189     | 0.129                     | 0.32           |
| <b><i>Insulin 1</i></b>   | 2953.35   | 1854.27                   | 0.155          |
| <b><i>Insulin 2</i></b>   | 7099.33   | 4103.86                   | 0.033          |
| <b><i>Glucagon</i></b>    | 161.19    | 166.19                    | 0.907          |
| <b><i>Slc2a2</i></b>      | 12.58     | 0.24                      | 0.007 *        |
| <b><i>glucokinase</i></b> | 4.69      | 0.79                      | 0.79           |
| <b><i>Slc30a8</i></b>     | 3.90      | 0.50                      | 0.008 *        |
| <b><i>IAPP</i></b>        | 1035.9    | 686.10                    | 0.31           |
| <b><i>Pdx1</i></b>        | 2.78      | 0.82                      | 0.005 *        |
| <b><i>NeuroD1</i></b>     | 0.47      | 0.33                      | 0.25           |
| <b><i>Neuronatin</i></b>  | 0.002     | 0.003                     | 0.37           |

**Table S1. Quantitative expression analysis of  $\beta$  cell genes in isolated islets from *MafA*<sup>WT</sup> and *MafA*<sup>RIP</sup> mice,** related to Figure 1. Data were normalized to the geomean of *Hprt* and  $\beta$ -*actin* mRNA levels and the mean value is shown. Significance was assessed using multiple t-test. \* indicates genes that were significantly down-regulated in *MafA*<sup>RIP</sup> compared with *MafA*<sup>WT</sup> islets.  $p \leq 0.01$ ,  $n \geq 3$

**Table S2.** Primer sequences for luciferase reporter constructs and ChIP analysis

| Gene                           | Primer Sequences-Luciferase constructs                           | Restriction enzymes                                                                    |
|--------------------------------|------------------------------------------------------------------|----------------------------------------------------------------------------------------|
| CHRNA4                         | <i>F</i> accaagggtctgctagttcc                                    | NheI G <sup>↓</sup> CTAG <sub>▲</sub> C<br>Sall G <sup>↓</sup> TCTGA <sub>▲</sub> C    |
|                                | <i>R</i> agtgtctctctgtgtgtccag                                   |                                                                                        |
| CHRNA4 <i>NheI/Sall</i>        | <i>F</i> <i>NheI</i> ctgctag accaagggtctgctagttcc                |                                                                                        |
|                                | <i>R</i> <i>Sall</i> ctgtcgac agtgtctctctgtgtgtccag              |                                                                                        |
| CHRNA2                         | <i>F</i> aatgggtcccagtggtgtcat                                   | XhoI C <sup>↓</sup> TCTGA <sub>▲</sub> G<br>HindIII A <sup>↓</sup> AGCT <sub>▲</sub> T |
|                                | <i>R</i> atccctcgtttcgctttt                                      |                                                                                        |
| CHRNA2 <i>XhoI/HindIII</i>     | <i>F</i> <i>XhoI</i> cactcgag aatgggtcccagtggtgtcat              |                                                                                        |
|                                | <i>R</i> <i>HindIII</i> gcaagctt atccctcgtttcgctttt              |                                                                                        |
| Human CHRNA4                   | <i>F</i> tcagcctctctcccattctg                                    | NheI G <sup>↓</sup> CTAG <sub>▲</sub> C<br>BamHI G <sup>↓</sup> GATC <sub>▲</sub> C    |
|                                | <i>R</i> ggatcc gacctgcagcattagcatca                             |                                                                                        |
| Human CHRNA4 <i>NheI/BamHI</i> | <i>F</i> <i>NheI</i> gctagc tcagcctctctcccattctg                 |                                                                                        |
|                                | <i>R</i> <i>BamHI</i> ggatcc gacctgcagcattagcatca                |                                                                                        |
|                                | <i>R</i> <i>BamHI</i> ggatcc gacctgcagcattagcatca                | <b>Position</b>                                                                        |
| mouse ChrA3                    | <i>F</i> CACCCACTTGCCTTGAATCT<br><i>R</i> AGGGACTCAGTGGTAGGGAC   | intron 1                                                                               |
| mouse ChrA4                    | <i>F</i> CACCCTACAGCTTGTCTCCA<br><i>R</i> AAAGCAGTTCCTACCCAG     | upstream                                                                               |
| mouse ChrB2                    | <i>F</i> TGAAGCGAAGCCTTTTGTCT<br><i>R</i> GAGATCAGGGGACCATTTC    | upstream                                                                               |
|                                | <i>F</i> GAGGGCTAGGAGGGGTTAAA<br><i>R</i> TCGCTTCATCTCGTCAATGC   | intron                                                                                 |
| mouse ChrB4                    | <i>F</i> CCAAGGGTCTGCTAGTTCCA<br><i>R</i> ATGAAATGCCTTGAGGATGG   | upstream                                                                               |
|                                | <i>F</i> CACAGGTCACAGGCTTTGG<br><i>R</i> TGCGGCAATAACAGATTCACA   | intron 1                                                                               |
| human CHRNA4                   | <i>F</i> ..CCCCAGACACCTTGCATTTT<br><i>R</i> TATTCCGCCCTTTTCCCACA | upstream                                                                               |

**Table S2** List of primers used for construction of dual luciferase constructs and chromatin immunoprecipitation analysis, and their location in the respective genes, related to Figures 3 and 4.
